# Supplementary material for: Repurposing FDA approved drugs as radiosensitizers for treating hypoxic prostate cancer
Source: Springer Nature journal article supplement (doi:10.1186/s12894-021-00856-x), 2021-07-01
Supplement: MOESM3 [file 19320094]

(A)

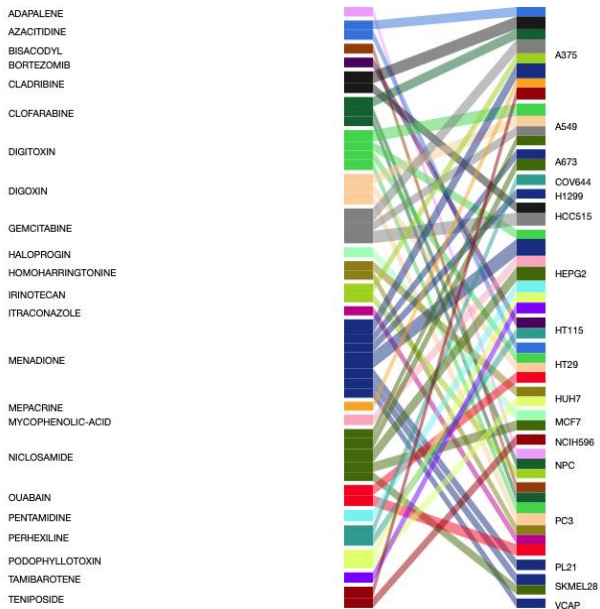

(B)

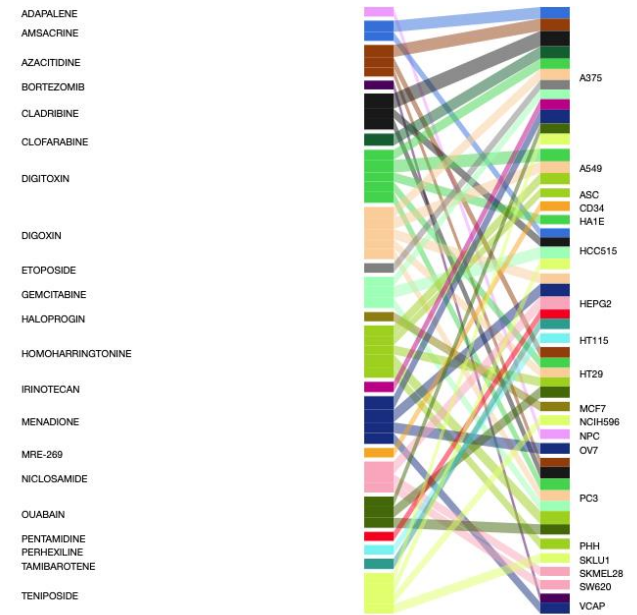

Supplementary Fig 2.
